# Supplementary material for: Dynamics and distribution of paxillin, vinculin, zyxin and VASP depend on focal adhesion location and orientation
Source: PubMed Central journal article supplement (PMC6639384; doi:10.1038/s41598-019-46905-2), 2019-07-18
Supplement: 41598_2019_46905_MOESM1_ESM.pdf [file 41598_2019_46905_MOESM1_ESM.pdf]

# **Dynamics and distribution of paxillin, vinculin, zyxin and VASP depend on focal adhesion location and orientation**

Karin Legerstee, Bart Geverts, Johan A. Slotman and Adriaan B. Houtsmuller

[supplemental figures & legends](#)

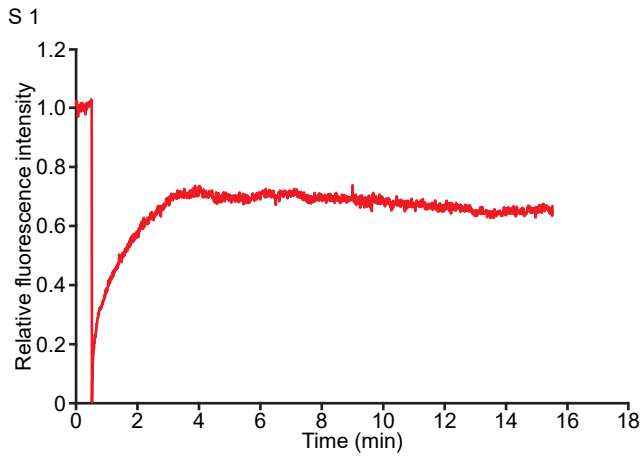

**Supplementary Fig. S1** Prolonged FRAP applied to paxillin in MDCK cells

Fluorescence intensity of paxillin-GFP expressed relative to prebleach levels and intensity immediately after the bleach.

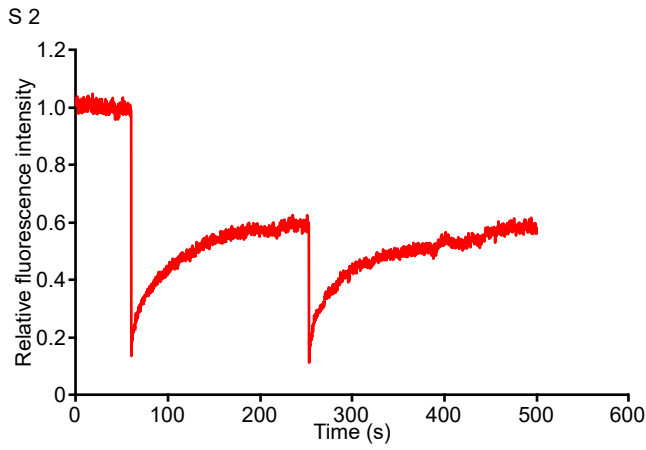

**Supplementary Fig. S2** Repeated FRAP applied to paxillin in MDCK cells

Fluorescence intensity of paxillin-GFP expressed relative to prebleach levels. The bleach pulse was repeated after five minutes

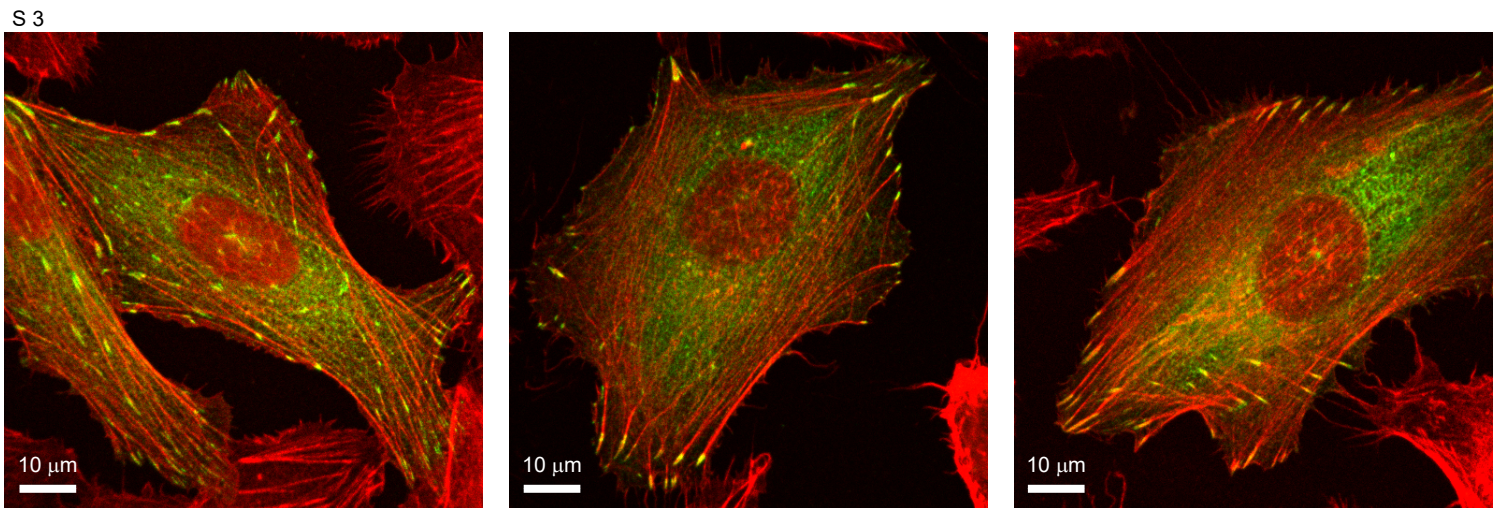

**Supplementary Fig. S3** F-actin fibres enter pointing FAs at their proximal ends

Overlay images of U2OS cells stably expressing paxillin-GFP (green) stained with phalloiding-CF405 to highlight the F-actin (red)
